# Supplementary material for: Multiple HIV-1 infections with evidence of recombination in heterosexual partnerships in a low risk Rural Clinical Cohort in Uganda
Source: PubMed Central journal article supplement (PMC3041926; doi:10.1016/j.virol.2010.12.025), 2011-03-01
Supplement: mmc1.pdf [file mmc1.pdf]

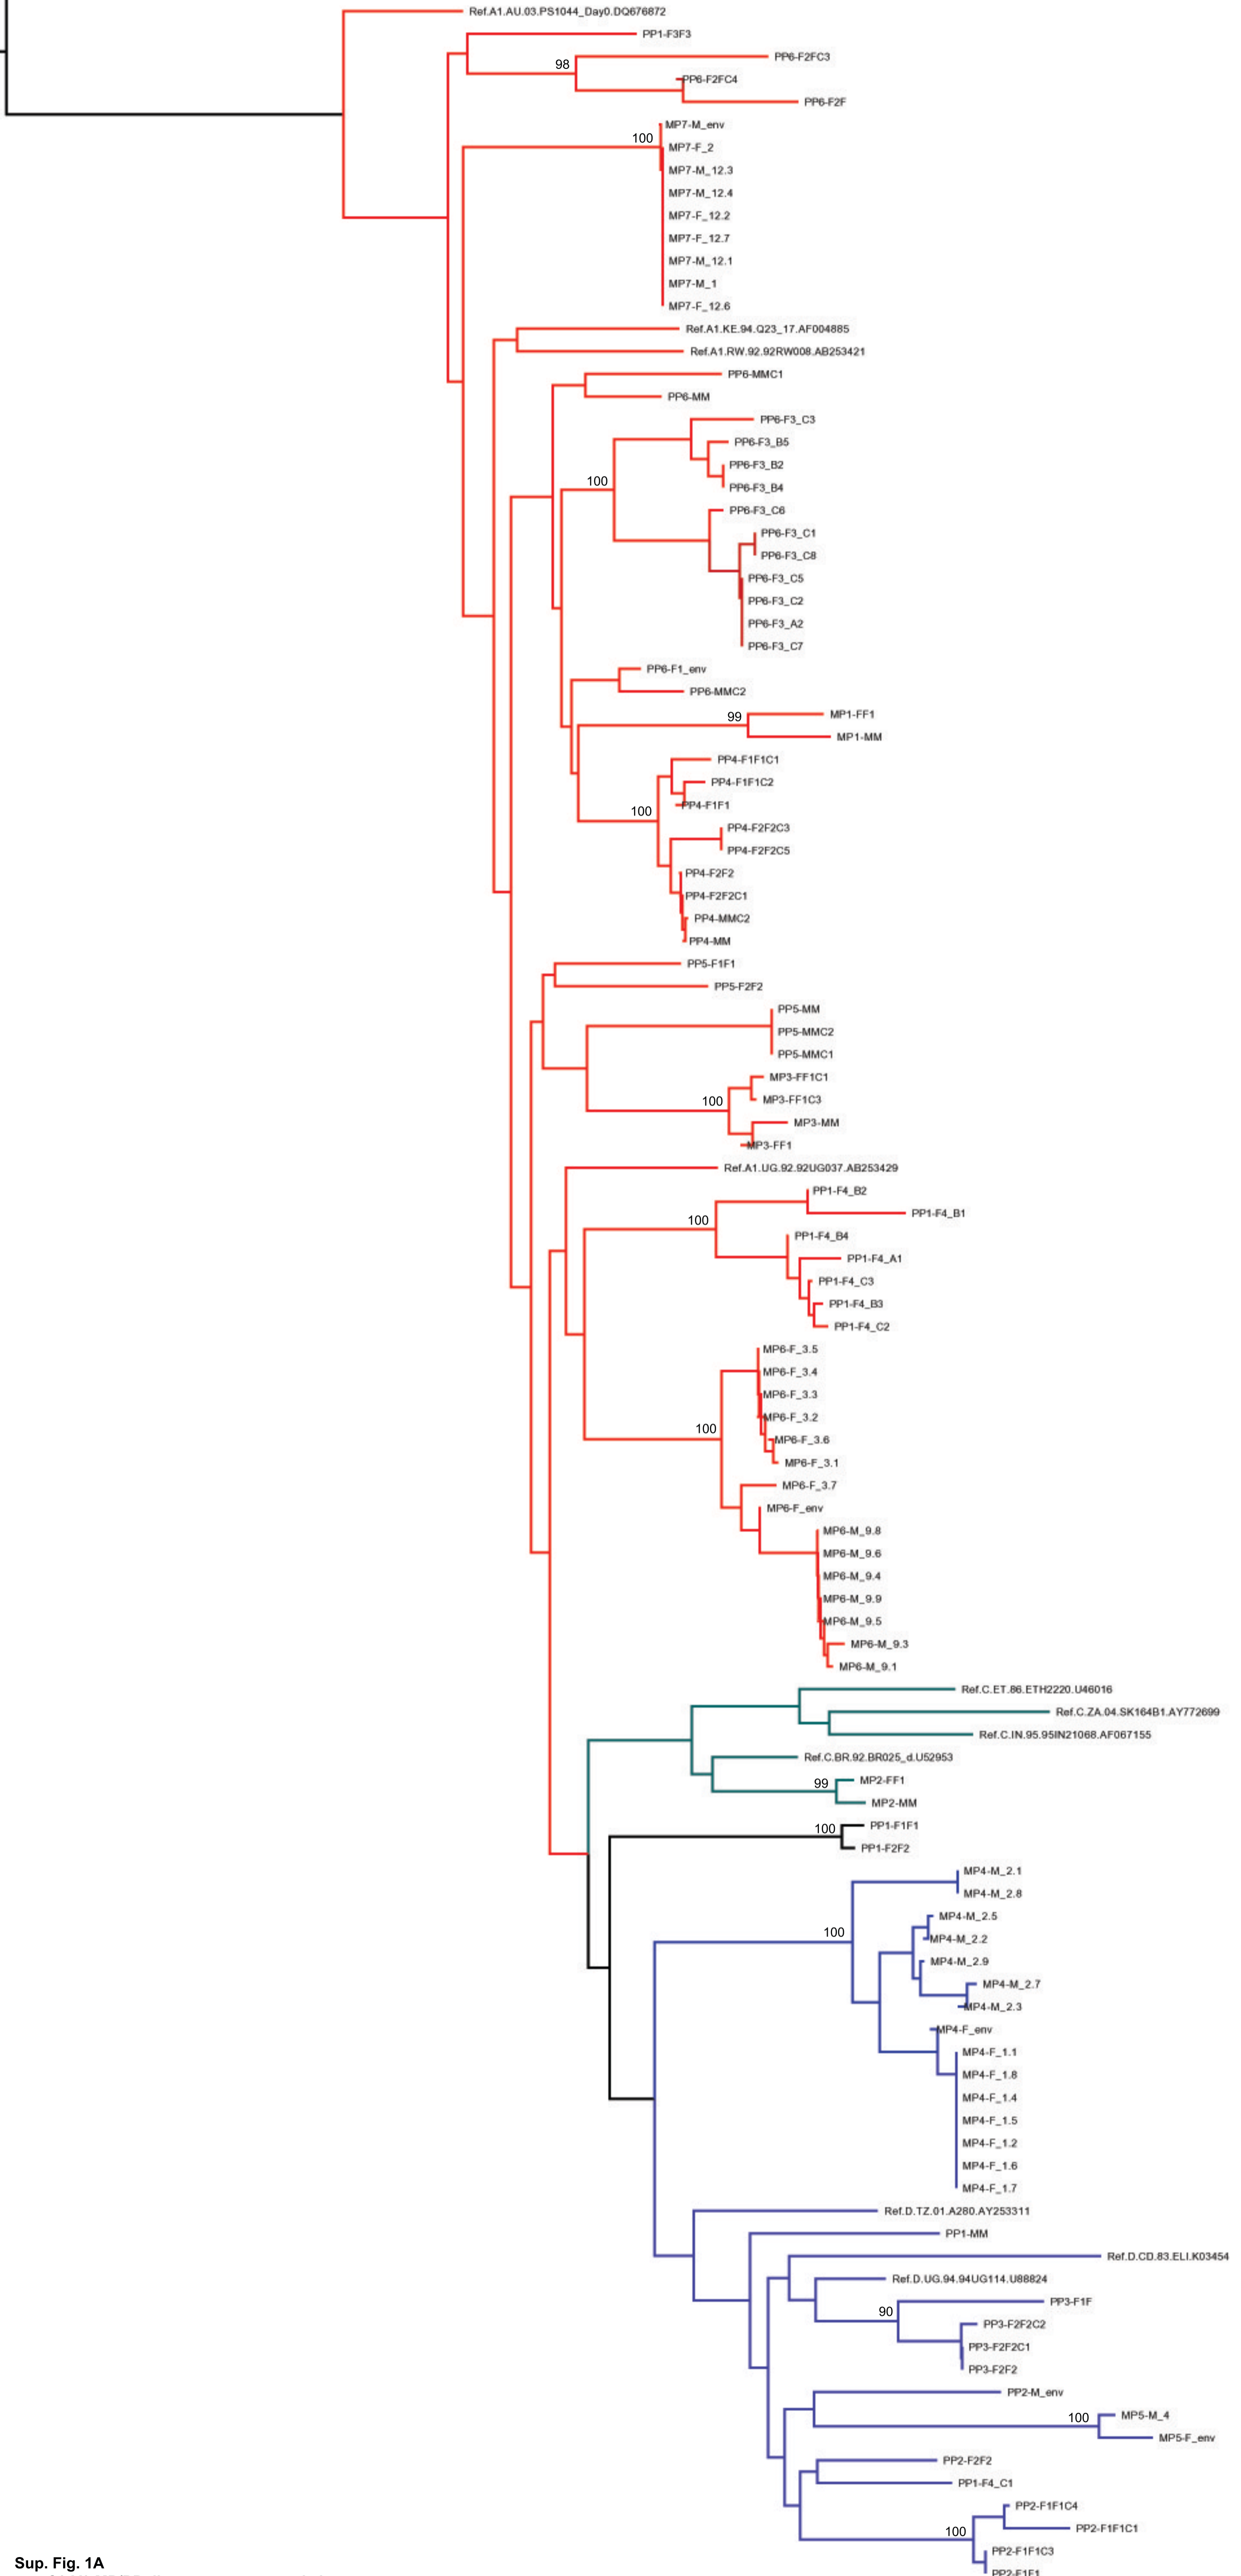

A

C

D

Sup. Fig. 1A  
env-C2-V3 MP/PP direct sequences and clones

0.05
