# Supplementary material for: Multiple HIV-1 infections with evidence of recombination in heterosexual partnerships in a low risk Rural Clinical Cohort in Uganda
Source: PubMed Central journal article supplement (PMC3041926; doi:10.1016/j.virol.2010.12.025), 2011-03-01
Supplement: mmc2.pdf [file mmc2.pdf]

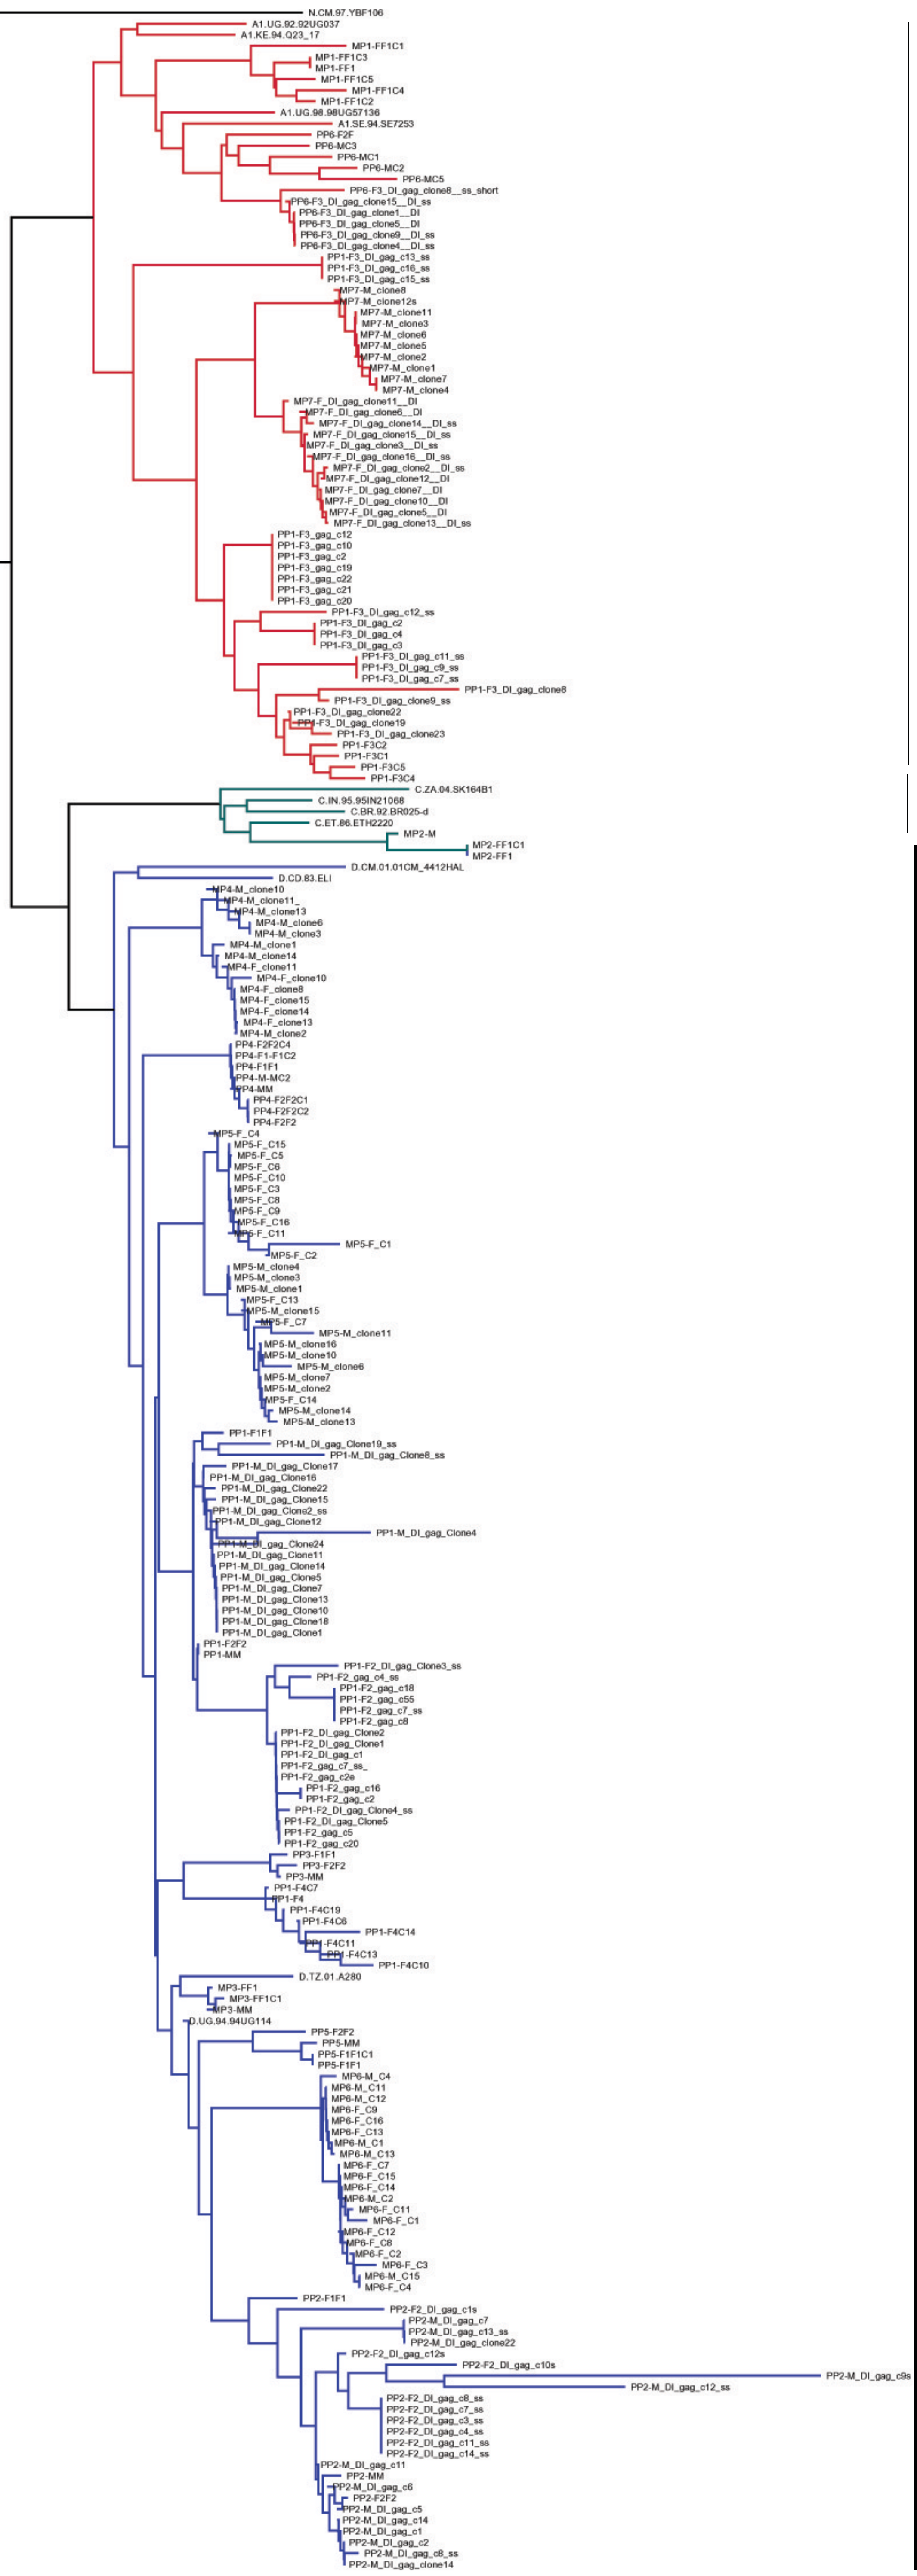

A

C

D

Sup. Fig. 1B  
gag p-24 clones and direct sequences

0.03
