# Supplementary material for: Multiple HIV-1 infections with evidence of recombination in heterosexual partnerships in a low risk Rural Clinical Cohort in Uganda
Source: PubMed Central journal article supplement (PMC3041926; doi:10.1016/j.virol.2010.12.025), 2011-03-01
Supplement: mmc4.pdf [file mmc4.pdf]

D

A

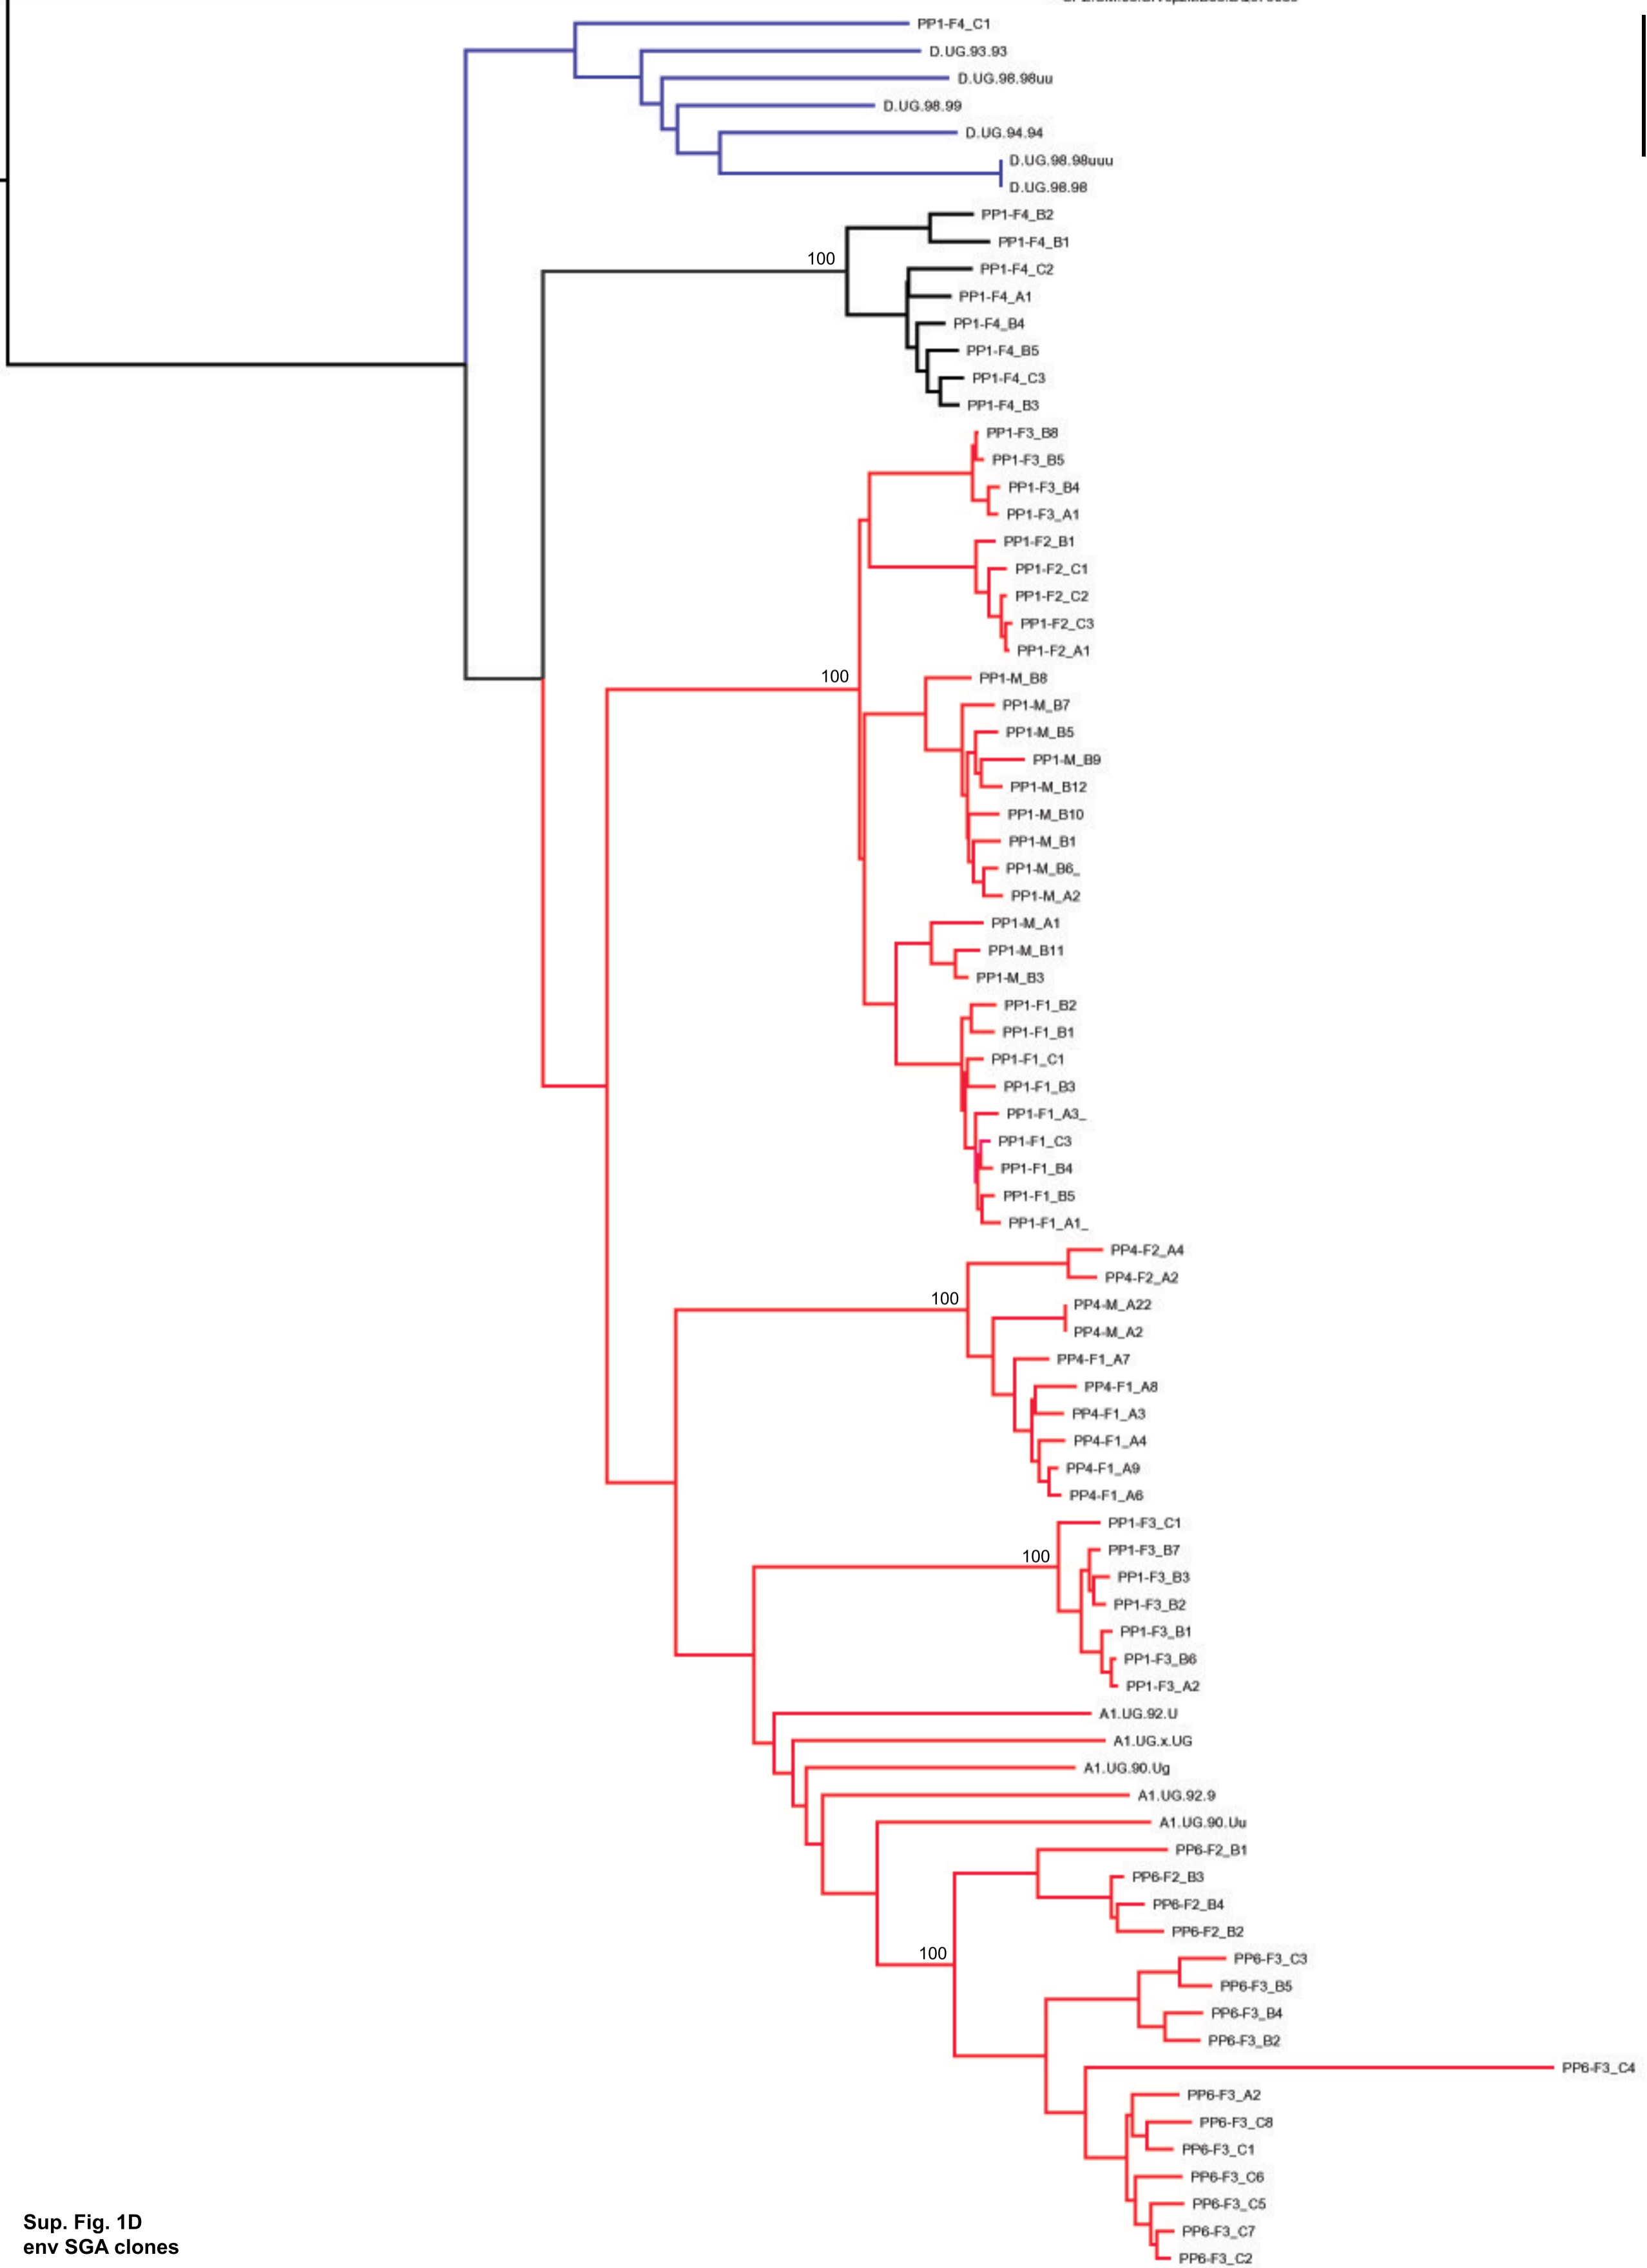

Sup. Fig. 1D  
env SGA clones

0.03
